# Supplementary material for: A consensus linkage map of oil palm and a major QTL for stem height
Source: PubMed Central journal article supplement (PMC4316154; doi:10.1038/srep08232), 2015-02-04

## A consensus linkage map of oil palm and a major QTL for stem height

May Lee, Jun Hong Xia, Zhongwei Zou, Jian Ye, Rahmadsyah, Yuzer Alfiko, Jingjing Jin, Jessica Virginia Lieando, Maria Indah Purnamasari, Chin Huat Lim, Antonius Suwanto, Limsoon Wong, Nam-Hai Chua and Gen Hua Yue

### Supplementary Figure 1 Genomic sequence of the gene for asparagine synthase-related protein and SNPs detected between a *Dura* and *Pisifera* tree

- A. 1197 bp upstream DNA sequence from the start codon of the gene for asparagine synthase of oil palm. Ten SNPs (see letters in red) between the *Dura* and *Pisifera* trees were detected.

TGAGAATTATTATGGGAAAATAATATCTTGAGTCCACATCGATTGTGAGTYRAGAGAAATTYTGATTTATATGAG  
ATCGAAATCTTCTCTCTTTAGTRAAAGTATCTTTATATAGGATAACATGATGAGATCCAAACYGGCACCTCGATGT  
ATTTGAGGTCAAAAAAAGATAATACCTCATCAAACAATATAGAGATTGATCCATCCGATCTATGATCCAAATC  
ATCCGAACCCYGATCACAATAAGAATCCATGCAAACGTTGTATTTAATCACTCGTTCA YCR TATAGATATTGAATAT  
TTGACTAAAAAAGTAGAACAAAATTTTTCATTAATCTAGATAARATTTTAGATTATTATAATTTATAATGGCAAC  
AGRTGATTATGAAGTATCGAAGGGTGTTCAGCTAGGRTTTTAGTATCCAAGATACTATTAGCCTTCTCTATGTTTG  
TCTGTTTTGTGTTTCTTCTCCATCTTGTAATAAATAAATAAAGGGGCGATTATGGAGACAGTCCCGCAGACAGGG  
CAAGGAATCCAAGAGTGCGATTTACCGTCGTCTCCGAAACGGAGGAGGTTGACGGGGTCTTCTCGGGACGTTA  
GGAGAAGGATCGGACCACACATCGTCCGCCAAAAACAACCCCGAGTGGGACCCACAGTGGTCTCTTTTTCTTT  
GTTTCGTTTTCTAATTTAATTTTTGCCCTCTCAAGCTAAAAATATCCCATCCGCGGGCTGGCAGATGTCGACGTG  
GCACCTCGTACACAGAGATATTTTCTTAAACCAGTGGGCGGTAGCGTGGATCCGCGTCAGCGGATAAGTTCTCCAC  
AGCGGCCTCCCTTCGTACCACTGCAGAAACACCGGATCTGGCCCCGATTTACGGCCCCACCCACGAGACCAAGTC  
AATTGTGTGACGTAAGGCGTGAACGGTAACCACACCCGGAAGTGTTCATATCTCGCATGTCTGGAATAGCTGCGC  
AATTCTAGCATGGGGAATAGGGATCCTTATCCTCCCATCCCTATCCAATTCCACCTCCAATTGAAAAATGTA  
CTATACCACCGGACACA ACTATATATACACCTTCCCTATCTCTTGCCAAACTCCATCCCCTCCGTTCCCTTTCTTC  
TCCTATTGCTTTACTTTTCTTGAGTTTTAGACGCAGAGAGAATAGAGAAG-Start codon

- B. 1745 bp DNA sequence from the start codon to stop codon of the gene for asparagine synthase-related protein of oil palm. Introns were labeled with green and underlined. Three SNPs in intron 1 and one SNP in exon 2 were detected between the *Dura* and *Pisifera* trees. The SNP in exon 2 did not change amino sequence. A TTC-microsatellite (see letters in pink) in intron 2 showed polymorphism between the *Dura* and *Pisifera* trees.

ATGTTGGCGATATTCCACAAGGCGTTCGCTCACCCGCCAGGAGCTCAACAGCCCCGGTGGCGGCCGGCGTGTG  
CCCAAGAACCCGGAGGAGATCCTCCGGGAGTCCACTCCCTCCACCTGGGGACTCCTTCTCCGCCACCTTCAGCG



**Supplementary Figure 2 Expression of the gene for asparagine synthetase-related protein in leaf (L) and trunk (T) tissues of short and tall trees of oil palm.** The expression in the trunk was significantly ( $P < 0.05$ ) higher in short trees than that in tall trees whereas the expression was similar ( $P > 0.05$ ) in leaf in short and tall trees.

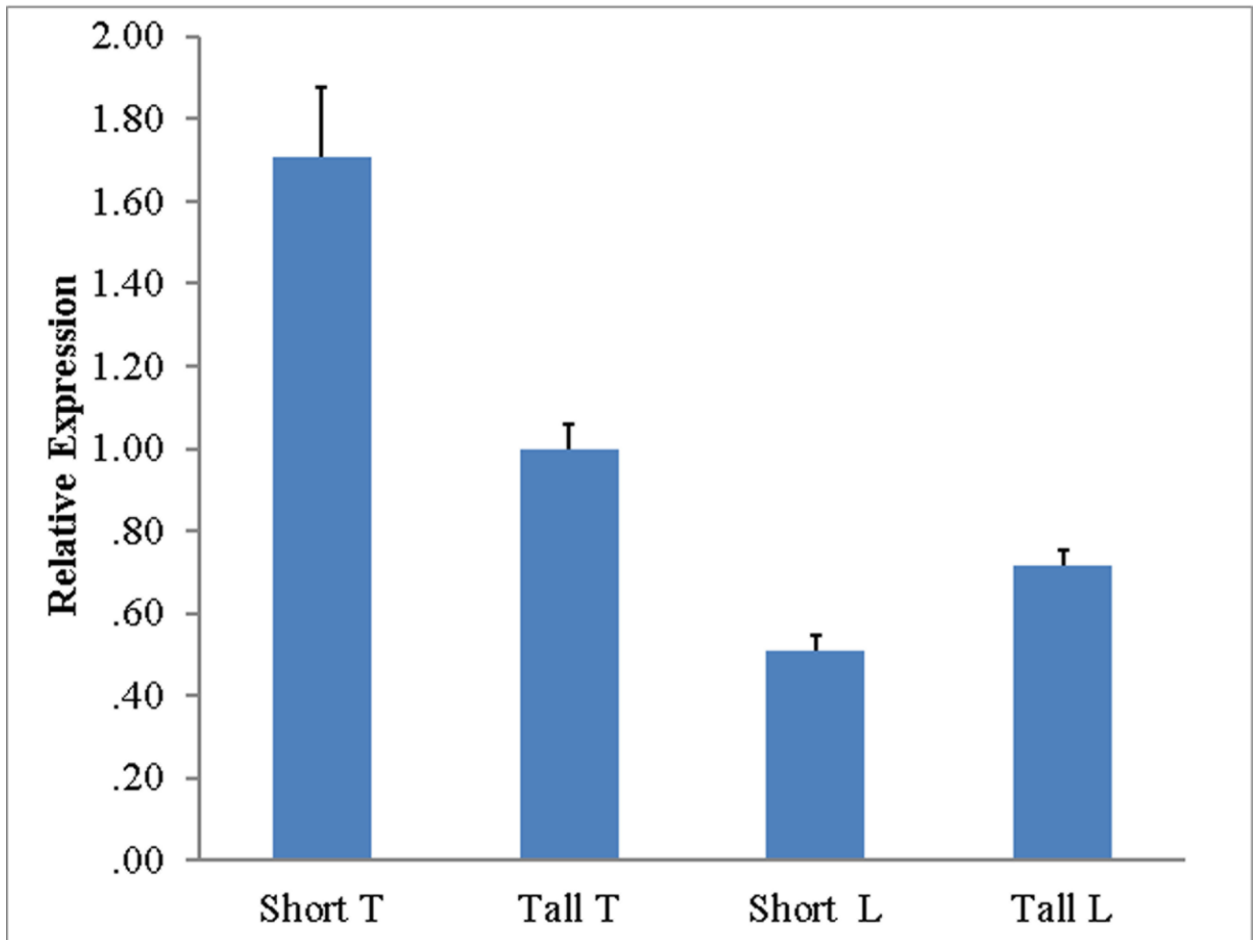

Supplement: srep08232-s1.pdf [file srep08232-s1.pdf]
